# Supplementary material for: Renal Ischemia Induces Epigenetic Changes in Apoptotic, Proteolytic, and Mitochondrial Genes in Swine Scattered Tubular-like Cells
Source: MDPI journal article supplement (doi:10.3390/cells11111803), 2022-05-31
Supplement: s1 [file s1]

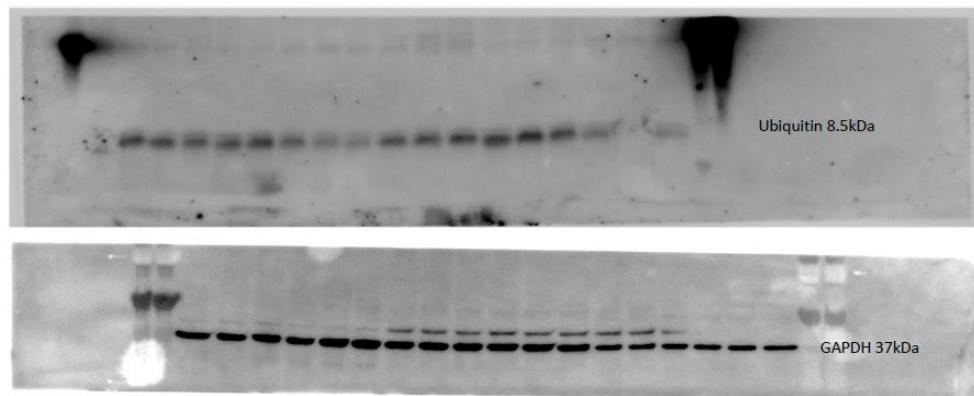

| Sample | Group      | Ubiquitin | GAPDH   | Ubiquitin/GAPDH |
|--------|------------|-----------|---------|-----------------|
| 1      | Normal-STC | 175,658   | 668,969 | 0.262580179     |
| 2      | Normal-STC | 305,348   | 662,406 | 0.460968047     |
| 3      | Normal-STC | 294,412   | 686,561 | 0.428821328     |
| 4      | Normal-STC | 278,729   | 665,551 | 0.418794352     |
| 5      | Normal-STC | 289,116   | 693,122 | 0.417121373     |
| 6      | Normal-STC | 314,028   | 696,764 | 0.450694927     |
| 7      | Normal-STC | 265,488   | 678,635 | 0.391208824     |
| 8      | Normal-STC | 227,463   | 684,242 | 0.332430631     |
| 9      | Normal-STC | 221,305   | 683,448 | 0.323806639     |
| 10     | RAS-STC    | 277,616   | 680,206 | 0.408135183     |
| 11     | RAS-STC    | 293,221   | 677,242 | 0.432963402     |
| 12     | RAS-STC    | 301,930   | 670,152 | 0.450539579     |
| 13     | RAS-STC    | 326,119   | 622,685 | 0.523730297     |
| 14     | RAS-STC    | 332,005   | 610,588 | 0.543746356     |
| 15     | RAS-STC    | 304,468   | 611,635 | 0.497793619     |
| 16     | RAS-STC    | 326,119   | 603,629 | 0.54026397      |
| 17     | RAS-STC    | 332,005   | 604,442 | 0.549275199     |
| 18     | RAS-STC    | 304,468   | 608,945 | 0.49999261      |

**Figure S1.** Protein expression and densitometric quantification of ubiquitin in Normal- and RAS-STCs.
